# Supplementary material for: Kainate receptors regulate development of glutamatergic synaptic circuitry in the rodent amygdala
Source: eLife journal article supplement (doi:10.7554/elife.52798), 2020-03-23
Supplement: supp [file elife-52798-supp-v1.zip]

Figure 8 - Supplement 1

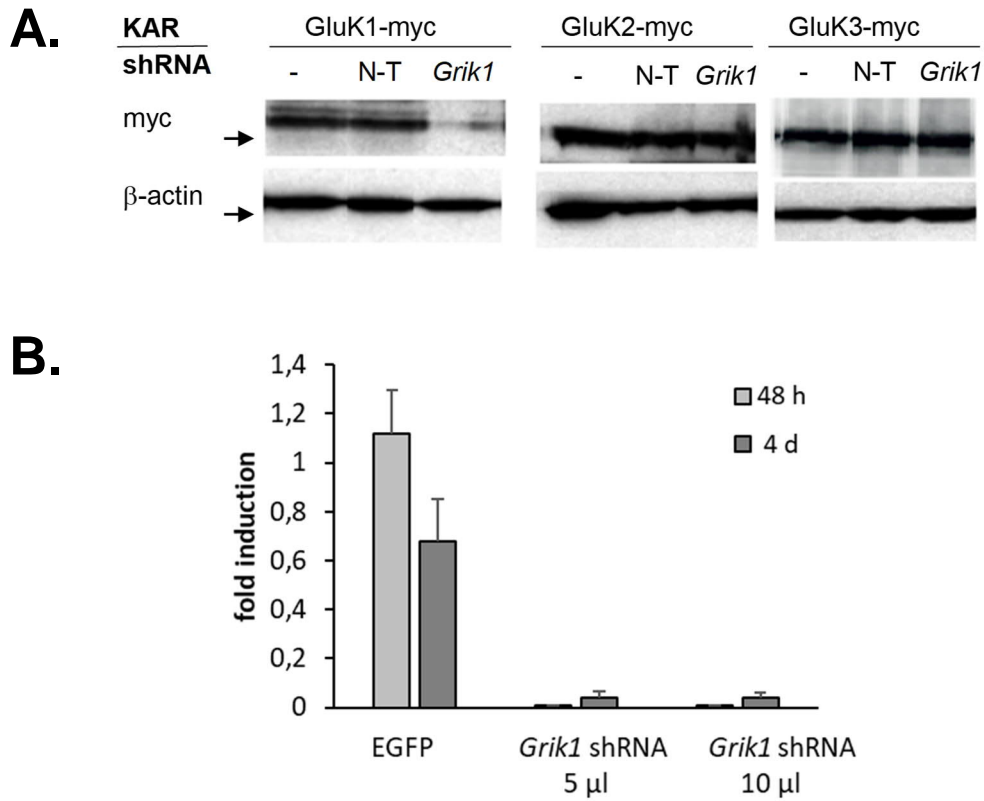

#### Validation of the *Grik1* shRNA

- A western blot illustrating that the *Grik1* shRNA strongly inhibited expression of GluK1-myc but not GluK2-myc or GluK3-myc in HEK293T cells.
- RT-qPCR results showing that the lentiviral *Grik1* shRNA construct strongly inhibited expression of endogenous GluK1 in dorsal root ganglion (DRG) neurons within 48 h from infection.

#### Methods:

Seven different shRNA sequences against rat *Grik1* in pLKO.1 vector (five obtained from Sigma Aldrich and two from TRC shRNA library, Biomedicum Helsinki Functional Genomics Unit) were tested for their efficiency to suppress expression of GluK1-myc and GluK2-myc and GluK3-myc in HEK293T cells as described (Sakha et al., 2016). The TRC Clone ID: TRCN0000100308 was selected based on its efficiency and specificity to knock down expression of the target protein in the heterologous system. The shRNA target sequence (CCTGGACATTATCAGTCTCAA) was subcloned into a modified pLKO.1 vector where the puromycin resistance cassette was replaced with GFP under the synapsin -1 promoter (pLKO.1-syn1-EGFP). Lentiviral particles were produced in HEK293T cells as described (Vesikansa et al., 2012). The lentiviral *Grik1* shRNA was then further tested in primary dorsal root ganglion neurons (DRG) where GluK1 KAR subunits are endogenously expressed. The neurons were prepared and cultured as described (Kysenius et al. 2012) and infected with the shRNA encoding lentiviral vectors at 4 and 7 DIV. For quantification of the *Grik1* mRNA levels, total RNA

was isolated from two independent cultures at 9 DIV and 12 DIV and RT-qPCR with Grik1 selective primers was carried out essentially as described (Sakha et al., 2016).

#### References:

Kysenius K, Muggalla P, Mätlik K, Arumäe U, Huttunen HJ. (2012) PCSK9 regulates neuronal apoptosis by adjusting ApoER2 levels and signaling. *Cell Mol Life Sci.* 69(11):1903-16.

Sakha P, Vesikansa A, Orav E, Heikkinen J, Kukko-Lukjanov TK, Shintyapina A, Franssila S, Jokinen V, Huttunen HJ, Lauri SE. (2016) Axonal Kainate Receptors Modulate the Strength of Efferent Connectivity by Regulating Presynaptic Differentiation. *Front Cell Neurosci.* 10:3.

Vesikansa A, Sakha P, Kuja-Panula J, Molchanova S, Rivera C, Huttunen HJ, Rauvala H, Taira T, Lauri SE. (2012) Expression of GluK1c underlies the developmental switch in presynaptic kainate receptor function. *Sci Rep.* 2:310.

#### Contributions :

Tiina-Kaisa Kukko-Lukjanov, Western blots in HEK cells, lentiviral vectors

Ester Orav, RT-qPCR

Kärt Mätlik , DRG cultures
