# Supplementary material for: Kainate receptors regulate development of glutamatergic synaptic circuitry in the rodent amygdala
Source: eLife journal article supplement (doi:10.7554/elife.52798), 2020-03-23
Supplement: supp [file elife-52798-supp-v1.zip]

Archive with 13 entries (13 files):
- elife_poa_e52798_Figure_7_source_data_1.xlsx
- elife_poa_e52798_Figure_6_figure_supplement_3.pdf
- elife_poa_e52798_Figure_1_source_data_1.xlsx
- elife_poa_e52798_Figure_5_source_data_1.xlsx
- elife_poa_e52798_Figure_4_source_data_1.xlsx
- elife_poa_e52798_Figure_6_source_data_1.xlsx
- elife_poa_e52798_Figure_3_source_data_1.xlsx
- elife_poa_e52798_Figure_8_figure_supplement_1.pdf
- elife_poa_e52798_Figure_8_source_data_1.xlsx
- elife_poa_e52798_Figure_2_source_data_1.xlsx
- elife_poa_e52798_Transparent_Reporting_File.docx
- elife_poa_e52798_Figure_6_figure_supplement_1.pdf
- elife_poa_e52798_Figure_6_figure_supplement_2.pdf
