# Supplementary material for: Kainate receptors regulate development of glutamatergic synaptic circuitry in the rodent amygdala
Source: eLife journal article supplement (doi:10.7554/elife.52798), 2020-03-23
Supplement: supp [file elife-52798-supp-v1.zip › elife_poa_e52798_Figure_1_source_data_1.xlsx]

## Sheet: Sheet1
Figure 1 A	GluK1	GluK2	GluK3	GluK4	GluK5	NETO1	NETO2
	1235.6	562.603	110.846	206.602	691.899	367.346	1072.68
	887.944	682.302	111.318	181.165	745.509	296.757	922.695
	1061.77	560.433	151.615	253.444	933.168	384.93	918.253
	1150.61	1198.95	76.0804	302.908	472.273
Figure 1 B		P14
	GluK1	32.0182	47.4312	55.4358	26.7551	14.4742	21.2604	26.6176
	GluK2/3	68.0569	67.4543	87.3537	52.041	60.3841	64.5231
	GluK3	2.73468	6.14762	2.73468	2.52375	1.75604	3.19862	2.88276	1.73803	0.614485
	GluK4	48.925	34.6993	73.564	48.925	29.719	73.5322	45.5915	79.8801
	GluK5	72.8126	77.3919	106.599	106.599
	NETO1	254.607	150.406	158.463	195.187	210.077	278.864	207.896	213.002
	NETO2	48.7849	65.854	98.1764	67.8857	74.6152	75.9872	74.3544	72.071
		P50
	GluK1	20.3483	55.4358	61.2758	17.2885	20.3926
	GluK2/3	63.522	45.7163	39.6843	62.9928	102.828	130.607	59.8836	30.1501	54.9195	103.543
	GluK3	2.33236	1.54509	0.408933	2.33236	1.54509	0.408933	1.41172
	GluK4	36.4426	78.6324	40.9536	42.9536	26.5758	40.9536	42.9536	26.5758	22.3982	59.3942
	GluK5	126.879	171.345	189.462
	NETO1	100.263	158.882	103.009	78.7679	150.584	94.9912	186.072	191.304	195.323	136.213	148.028	119.82
	NETO2	30.832	33.1286	27.2132	30.3146	20.9133	46.4094	40.824	40.262	45.4543
Figure 1 C		P4			P14
	GluK2/3	0.135945	0.169111	0.158739	0.119751	0.139204	0.12477
	GluK5	0.116136	0.132369	0.1099	0.101021	0.115661	0.077491
Figure 1 E
GluK1		P4							P14
	LA	0.00972561	0.024092	0.0206406	0.00982645	0.0163539	0.0145252	0.00709139	0.00337216	0.00150382	0.00220415	0.0041244	0.00341877	0.00095584	0.00161231
	BA	0.00553633	0.0130618	0.0137562	0.00845367	0.00806204	0.00855862	0.00732601	0.00348788	0.00301246	0.00543731	0.00576375	0.0025871	0.00159932	0.00287708
	CeA	0.00510213	0.00971264	0.00911408	0.00642	0.00803298	0.00676106	0.00734302	0.00201446	0.0023547	0.00350718	0.00154673	0.00211429	0.00049497	0.00245918
GluK2		P4							P14
	LA	0.0108696	0.0134497	0.0125903	0.0147059	0.0136585	0.0109705		0.00897674	0.012159	0.00854348	0.00789627	0.0072	0.00966667
	BA	0.005225	0.00872955	0.00590373	0.0134615	0.0124088	0.00704225		0.00326667	0.00379612	0.00344056	0.00304532	0.00741935	0.0141177
	CeA	0.00114179	0.00317913	0.00123396	0.00980392	0.011	0.00449438		0.00174564	0.00129944	0.00098058	0.00122222	0.00179104	0.0025
GluK5		P4							P14
	LA	0.0104762	0.0145454	0.0135593	0.00723404	0.00780488	0.0134146		0.0114983	0.0181185	0.00704698	0.00861244	0.00818182	0.0161572
	BA	0.0119761	0.0149171	0.0151409	0.0150235	0.0103798	0.0137851		0.0115132	0.0177936	0.0115789	0.0125	0.0114286	0.0217877
	CeA	0.010175	0.0118644	0.0125764	0.00722892	0.00538642	0.00875274		0.00455764	0.00826446	0.00582011	0.0078125	0.006	0.0109677
