# Supplementary material for: Kainate receptors regulate development of glutamatergic synaptic circuitry in the rodent amygdala
Source: eLife journal article supplement (doi:10.7554/elife.52798), 2020-03-23
Supplement: supp [file elife-52798-supp-v1.zip › elife_poa_e52798_Figure_2_source_data_1.xlsx]

## Sheet: Sheet1
Figure 2 B	LA	P4-7	P9-11	P14-16	P20-21	BA	P4-7	P9-11	P14-16	P20-21	CeA	P4-7	P9-11	P14-16	P20-21
		0.415	0.975	3.695	3.34167		0.33	1.92	10.6567	4.41		0.25	3.58	2.32	1.3
		0.335	1.59167	4.59	3.38667		0.155	2.12833	6.605	8.06		0.775	1.13	3.62	1.54
		0.52667	3.59667	4.16667	6.76167		0.225	6.87333	3.47333	5.435		0.35	1.93	3.39	2.2
		0.32833	0.655	8.79167	3.87833		1.11667	4.65667	5.34333	3.95167		0.66	2.185	1.21	2.56
		0.28	2.55167	10.675	2.13833		0.375	4.55667	8.57	6.34667		0.772	1.1	0.86	1.7
		0.80667	1.21167	1.30667	5.87		0.58167	3.21	14.9133	6.18		0.21	2.75	2.98	1.1
		0.35833	1.13	2.79833	5.085		0.94667	2.75833	5.67667	9.82167		0.535	3.03	2.125	1.1
			3.62167	3.98833			0.155	0.695	5.29667	3.49333		1.5	0.48	0.58	1.12
			3.46				0.95667		2.41333			0.1			6.64
							0.67167		2.86333						2.19
							1.955
Figure 2 D	LA	P4-7	P9-11	P14-16	P20-21	BA	P4-7	P9-11	P14-16	P20-21	CeA	P4-7	P9-11	P14-16	P20-21
		0.03	0.46	0.78	0.84		0.11	0.22	0.59	0.9		0.32	1.04	0.98	1.06
		0.19	0.59	0.79	1.46		0.18	0.18	0.67	0.43		0.25	0.27	0.86	0.81
		0.29	0.89	0.67	1.55		0.17	0.87	0.42	1.48		0.18	0.61	0.62	0.94
		0.07	0.22	1.81	1.97		0.13	0.29	0.5	0.5		0.4	0.17	1.84	1.03
		0.31	0.35	0.53	1.72		0.12	0.65	0.75	1.13		0.23	1.06	1.53	0.88
		0.2	0.77	1.16	0.92		0.15	0.53	0.35	0.69		0.13	0.64	1.28	0.95
		0.13	0.65	1.06	1.83			0.3	0.36	0.91			0.51	0.57	0.77
		0.02	0.53		1.11								1.19		1.43
			1.2		1.69										1.38
