# Supplementary material for: Kainate receptors regulate development of glutamatergic synaptic circuitry in the rodent amygdala
Source: eLife journal article supplement (doi:10.7554/elife.52798), 2020-03-23
Supplement: supp [file elife-52798-supp-v1.zip › elife_poa_e52798_Figure_3_source_data_1.xlsx]

## Sheet: Sheet1
Figure 3 C	LA P4-6	LA P14-16	BA P4-6	BA P14-16	CeA P4-6	CeA P14-16
	1.53	229.8	13.15	17.64	27.89	9.89
	10.16	47.76	7.02	18.19	15.01	17.18
	10.99	25.02	6.1	58.26	19.01	28.35
	10.59	37.78	9.92	50.84	13.03	42.85
	7.11	127.78	6.68	17.64	12.73	26.52
	2.69	61.55	9.06	37.08	13.18	23.13
	0.46	155	10.8	38.85	6.71	37.38
	5.25	20.32	13.4	50.57	14.4476	20.9
	0.18	58.58	12.76	34.66	11.0337	16.5682
	6.72	189.03	5.46	14.8711	13.249	22.1084
		41.8689	5.29829	56.1908	17.6209	32.2084
		32.6365	1.86948	51.3529	17.3761	45.752
		21.088	2.07075
			4.51417
Figure 3 D
	KA														DA
LA	1.53	10.16	10.99	10.59	7.11	2.69	0.46	5.25	0.18	6.72					0	1.68	2.66	10.8	4.3	4.52	9.4	0	5.88	6.5
BA	13.15	7.02	6.1	9.92	6.68	9.06	10.8	13.4	12.76	5.46	5.29829	1.86948	2.07075	4.51417	13.67	15.41	15.5	22.83	22.09	13.21	13.27	15.13	20.36
