# Supplementary material for: Kainate receptors regulate development of glutamatergic synaptic circuitry in the rodent amygdala
Source: eLife journal article supplement (doi:10.7554/elife.52798), 2020-03-23
Supplement: supp [file elife-52798-supp-v1.zip › elife_poa_e52798_Figure_4_source_data_1.xlsx]

## Sheet: Sheet1
Figure 4
	LA P4	basal	ACET	wash	LA P14-16	basal	ACET	wash	BA P4-7	basal	ACET	wash	BA P14-16	basal	ACET	wash	CeA P5-6	basal	ACET	wash	CeA P10-11	basal	ACET	wash
		0.415	0.465	0.245		5.12292	4.77667	4.63333		0.149777	0.194842	0.104787		2.136	1.533	1.57917		0.26917	0.135	0.29		1.02167	1.03	0.787
		0.49667	0.655	0.77667		6.615	5.98	6.37667		0.078081	0.107601			1.32133	1.408	1.215		0.2	0.08333	0.16		0.92167	1.02333	1.11
		0.56333	0.57333	0.27167		8.43472	6.83833	7.37333		0.323263	0.418766	0.279766		1.08267	0.77433	0.86375		0.46667	0.36167	0.415		0.485	0.48667	0.44
		0.39333	0.64333	0.625		4.445	4.55833			0.103798	0.142853	0.117129		1.65533	1.73833	2.35292		0.24667	0.20667	0.26		2.09	2.89333	2.295
		0.23063	0.25711	0.22465		5.14833	4.4125	4.955		0.332613	0.526163	0.177481						0.07833	0.065	0.09333		0.145	0.1	0.131
		0.551405	0.471967	0.393524		4.45833	4.075			0.457902	0.866284	0.320483						0.11333	0.08333	0.10833		0.555	0.60833	0.505
		0.32981	0.19397	0.23185						0.151843	0.209152	0.207482						0.06833	0.05667	0.09333		0.11833	0.11167	0.10167
										0.768771	1.3628	0.884186						0.24833	0.13667	0.21167		2.36	2.055	1.31167
										0.353662	0.385361	0.356129						0.075	0.08	0.09333
										0.179719	0.201855	0.189445						0.24833	0.17	0.26
										0.11663	0.12432	0.08692						0.22833	0.18	0.32167
