# Supplementary material for: Kainate receptors regulate development of glutamatergic synaptic circuitry in the rodent amygdala
Source: eLife journal article supplement (doi:10.7554/elife.52798), 2020-03-23
Supplement: supp [file elife-52798-supp-v1.zip › elife_poa_e52798_Figure_5_source_data_1.xlsx]

## Sheet: Sheet1
Figure 5A							Figure 5B				Figure 5C				Figure 5 D				Figure 5E
	EPSC ampl	control	ACET	PPR	control	ACET		EPSC amplitude	basal	GYKI53655		basal	KA	wash		basal	ATPA	wash		SHAM	basal	ACET	wash	PTX	basal	ACET	wash
		-48.76	-34.02		0.63	1.3			-163.947	-14.5467		0.35167	0.69	0.22167		0.335	0.795	0.475			2.41	1.48	2.08		1.685	2.065	1.62167
		-255.3	-140.25		0.93	1.48			-78.1506	-0.0282857		0.35333	0.4	0.32667		0.245	0.29333	0.16667			1.26	0.755	0.975		1.67667	1.42833	1.3576
		-167.54	-114.76		1.4	1.8			-144.36	-15.442		0.37167	0.48333	0.235		0.79667	1.62333	0.76303			1.78667	1.42833	1.965		0.32	0.42	0.37
		-227.9	-164.14		1.6	2.7			-40.1334	-8.7125		1.18	1.31833	0.83333		1.19167	1.71	1.447			1.215	0.955	1.885		1.55667	1.71833	1.17
		-74.5	-28.12		1.5	1.69			-23.468	-1.9685		1.40833	1.59167	1.04		0.598333	0.828333	0.469444			1.95	1.88	2.05		0.575	0.84333	0.61333
		-87.07	-45.22		1.16	1.8			-29.8157	-1.0985		0.29	0.47667	0.47		1.60833	3.43167	0.8
		-33.14	-19.53		0.912353	1.96477			-181.503	-7.49733		0.235	0.31	0.23167		0.70833	1.975	1.20833
		-51.97	-44.25		1.01271	1.06622			-34.6782	-3.00371
					1.37762	1.42319
