# Supplementary material for: Kainate receptors regulate development of glutamatergic synaptic circuitry in the rodent amygdala
Source: eLife journal article supplement (doi:10.7554/elife.52798), 2020-03-23
Supplement: supp [file elife-52798-supp-v1.zip › elife_poa_e52798_Figure_6_source_data_1.xlsx]

## Sheet: Sheet1
					mEPSC freq				mEPSC ampl											mEPSC freq		mEPSC ampl
Figure 6A	LA	BA	CeA	Figure 6B	LA, GFP	LA, CRE	CeLA, GFP	CeLA, CRE	LA, GFP	LA, CRE	CeLA, GFP	CeLA, CRE	Figure 6C	GFP	CRE	Figure 6D	GFP	CRE	Figure 6E	GFP	CRE	GFP	CRE	Figure 6F	GFP	CRE	Figure 6G
	68.9	41.8	18		3.952	3.952	7.8	2.7	22.239	22.239	28.89	18.26		1.48256	0.92208		1722.31	977.268		6.81	6.778	30.961	22.2208		2.05181	1.18056
	79.3	70	7.9		4.231	4.231	2.6	2.5	17.9312	17.9312	25.4	28.26		1.14325	0.84265		2420.41	1354.26		6.706	4.952	29.9712	30.2764		1.33501	0.843137
	88.5	71.6	2.8		4.251	4.251	3.3	1.8	16.926	16.926	25.5	18.3		1.8655	0.44295		2189.26	912.045		8.316	6.871	27.727	19.341		1.46006	0.528571
					5.485	5.485	6.5	2	15.6604	15.6604	25.8	14.5		1.57081	1.59574		3847.79	2344.26		3.577	6.298	15.7332	21.595		1.73684	1.42857
					2.022	2.022	1.8	1.9	18.466	18.466	20.64	15.034		1.17925	0.26897		760.791	1116.84		5.903	7.434	18.0306	16.5256		0.787671	0.909091
					4.065	4.065	4.1	1.17	17.9186	17.9186	20	13.55		0.81395	0.37713		2066.1	1215.62		3.85	3.451	23.7944	19.5258		1.30159	1.61702
					3.245	3.245	1.9	0.32	22.0598	22.0598	14.7	12.3		1.39031	0.38591		2803.19	1184.1		2.741	5.039	17.3054	29.4042		0.78481	0.921875
					3.92	3.512	12	2.6	18.5192	16.4878	19	17.9		1.17805	1.1817		2020.52	681.526		4.85	8.668	16.4528	30.5018		0.816901	0.965116
					4.059	5.111	3.8	3.65	24.99	20.1782	25	15.1		0.85188	0.96423		1239.28	714.787			3.717		24.9914		0.951613	1.59722
					3.584	2.59	4.9	1.3	27.0844	19.5146	20.6	14.7		1.15385	1.0438		1639.92	860.759								1.23729
					1.839	2.468		0.66	17.199	20.9552		14		1.0375	0.275			972.635
					3.654	2.245			20.4036	21.0238					0.778098
					2.457				16.11						0.90625
