# Supplementary material for: Kainate receptors regulate development of glutamatergic synaptic circuitry in the rodent amygdala
Source: eLife journal article supplement (doi:10.7554/elife.52798), 2020-03-23
Supplement: supp [file elife-52798-supp-v1.zip › elife_poa_e52798_Figure_7_source_data_1.xlsx]

## Sheet: Sheet1
Figure 7A	(mA)	GFP1	GFP2	GFP3	GFP4	GFP5	GFP6	GFP7	GFP8	GFP9	CRE1	CRE2	CRE3	CRE4	CRE5	CRE6	CRE7	CRE8	Figure 7B	GFP	CRE	Figure 7C	1.12714	2.76326	Figure 7D	sEPSCs	LF GFP	LF CRE	RF GFP	RF CRE	sIPSCs	LF GFP	LF CRE	RF GFP	RF CRE	E/I ratio	LF GFP	LF CRE	RF GFP	RF CRE
	0.2	-50.14	-7.233	4.395	-1.984	-2.014	-59.906	-2.472	-4.791	-51.361	-7.477	-7.05	-3.987	-2.563	-1.495	-3.632	-20.02	-2.03		0.759139	0.517143		1.28278	1.00605			15.066	3.094	2.959	11.431		2.83	0.638	2.487	0.811		5.32367	4.84953	1.18979	14.0949
	0.5	-124.115	-8.301	-118.927	-27.649	-9.338	-80.475	-51.239	-4.181	-58.441	-18.311	-19.196	-57.648	-2.563	-13.062	-11.536	-37.354	-15.869		0.723086	0.469343		1.47732	1.48838			2.029	5.116	1.756	6.168		0.705	1.097	0.465	0.301		2.87801	4.66363	3.77634	20.4917
	1	-113.831	-23.193	-75.348	-34.027	-15.503	-89.539	-51.88	-32.013	-63.873	-17.944	-24.231	-63.049	-16.724	-30.762	-22.736	-41.534	-31.148		3.35189	0.523515		0.927044	0.627531			9.397	3.834	4.874	3.898		0.858	4.261	0.818	1.765		10.9522	0.899789	5.95844	2.2085
	1.5	-164.948	-114.807	-151.703	-53.955	-25.146	-69.122	-50.842	-44.952	-120.422	-20.416	-23.743	-96.13	-53.375	-31.097	-19.653	-33.997	-44.647		0.478233	1.38895		1.85148	1.92949			8.877	8.855	8.225	4.274		0.683	1.826	1.923	1.673		12.9971	4.8494	4.27717	2.55469
	2	-167.145	-184.021	-371.552	-73.761	-128.387	-128.174	-57.404	-77.85	-123.383	-50.11	-18.127	-78.705	-96.776	-33.243	-166.199	-65.826	-41.748		0.534737	0.729745		1.56784	3.32895			2.68	5.682	19.261	2.411		1.786	1.424	0.672	4.959		1.50056	3.99017	28.6622	0.486187
	2.5			-485.26	-110.779		-186.859	-52.307	-104.126	-155.09	-56.519	-20.691	-51.636		-50.903	-233.765	-70.77	-50.568		1.50473	0.355311		2.15789	1.88687			5.697	6.121	2.699	3.249		0.571	1.347	1.027	4.281		9.97723	4.54417	2.62804	0.758935
							-282.766		-77.301	-156.616		-21.881					-73.242			1.74064	0.04482		0.879778	1.00536			6.583	1.3	2.515	5.334		0.619	2.66	2.739	2.511		10.6349	0.488722	0.918218	2.12425
																				1.22009	0.865443		1.71593	0.849531			6.834	7.137	1.925	2.002		3.443	1.087	0.793	1.742		1.9849	6.56578	2.42749	1.14925
																				0.673383	0.532851		2.04929	0.909129			19.139	9.159	1.029	3.444		1.756	1.277	0.566	2.193		10.8992	7.17228	1.81802	1.57045
																				0.762014	0.133904						6.928	1.109	2.424	6.541		0.689		1.737	0.91		10.0552		1.39551	7.18791
																				0.118672	0.186772						14.423	2.542	1.717	5.923		1.126	0.458	0.796	1.679		12.8091	5.55022	2.15704	3.5277
																				4.03782	0.064268						10.428	6.976	13.055	4.878		0.362	1.646	0.629	2.511		28.8066	4.23815	20.7552	1.94265
																					0.930435
