# Supplementary material for: Kainate receptors regulate development of glutamatergic synaptic circuitry in the rodent amygdala
Source: eLife journal article supplement (doi:10.7554/elife.52798), 2020-03-23
Supplement: supp [file elife-52798-supp-v1.zip › elife_poa_e52798_Figure_8_source_data_1.xlsx]

## Sheet: Sheet1
Figure 8A	GluK1 shRNA			Figure 8B	mEPSC freq	GFP P10	GluK1 shRNA P10	mEPSC ampl	GFP P10	GluK1 shRNA P10		Figure 8C	mEPSC freq	GFP P14	GluK1 oe P14	mEPSC ampl	GFP P14	GluK1 oe P14	Figure 8D	GluK1 oe			GFP			Figure 8E	GFP	GluK1 oe	Figure 8F	GFP	GluK1 oe
	LA	BA	CeA			1.32	0.4		15.56	10.2				1.405	2.182		28.6	16.39		point 1	point 2	point 3	point 1	point 2	point 3		2302.97	4254.92		0.68432	0.7102
	66.9	0.7	0			1.11	0.92		17.09	22.9				1.16833	6.961		26.4	14.37		2.66167	1.66667	1.17917	1.405	1.33	1.53		1937.18	3799.78		1.09378	0.41561
	61.9	1.5	0.16			2.47	1.6		27.9	12.9				2.879	9.478		15.05	14.2		3.14333	1.42833		1.16833	1.10333	1.045		1534.14	5287.38		0.96465	1.14616
	47.7	0	0			1.76	0.15		18.38	10.3				1.016	5.097		12.3	12.79		6.335	4.55167	5.26667	6.05833	6.215	5.90833		2383.95	2703		1.273	0.64845
						3.46	0.11		24.7	16.7				5.691	8.584		12.5	20		2.21667	1.43	2.24667	2.97667	3.57083	2.82319		1288.1	2865.32		0.77058	0.77077
						1.5								2.879	2.695		19.8	17.56		9.65625	8.85625	10.3444	2.45	2.62	3.16		2302.97	4865.43		1.14322	1.00894
	58.8333	0.733333	0.0533333											2.046	3.377		17.7	21.72									1203.58			0.83855	0.97348
	4.69547	0.353815	0.0435465											4.553	3.26		11.8	17.054												0.80611
															5.204			24.24												0.92991
															2.66167			15.9
															3.14333			13.2
															6.335			15.2
															2.21667			12.6
															9.65625
