# Supplementary figures and images for: Kainate receptors regulate development of glutamatergic synaptic circuitry in the rodent amygdala
Source: eLife journal article supplement (doi:10.7554/elife.52798), 2020-03-23

**Figure 6 - figure supplement 2**

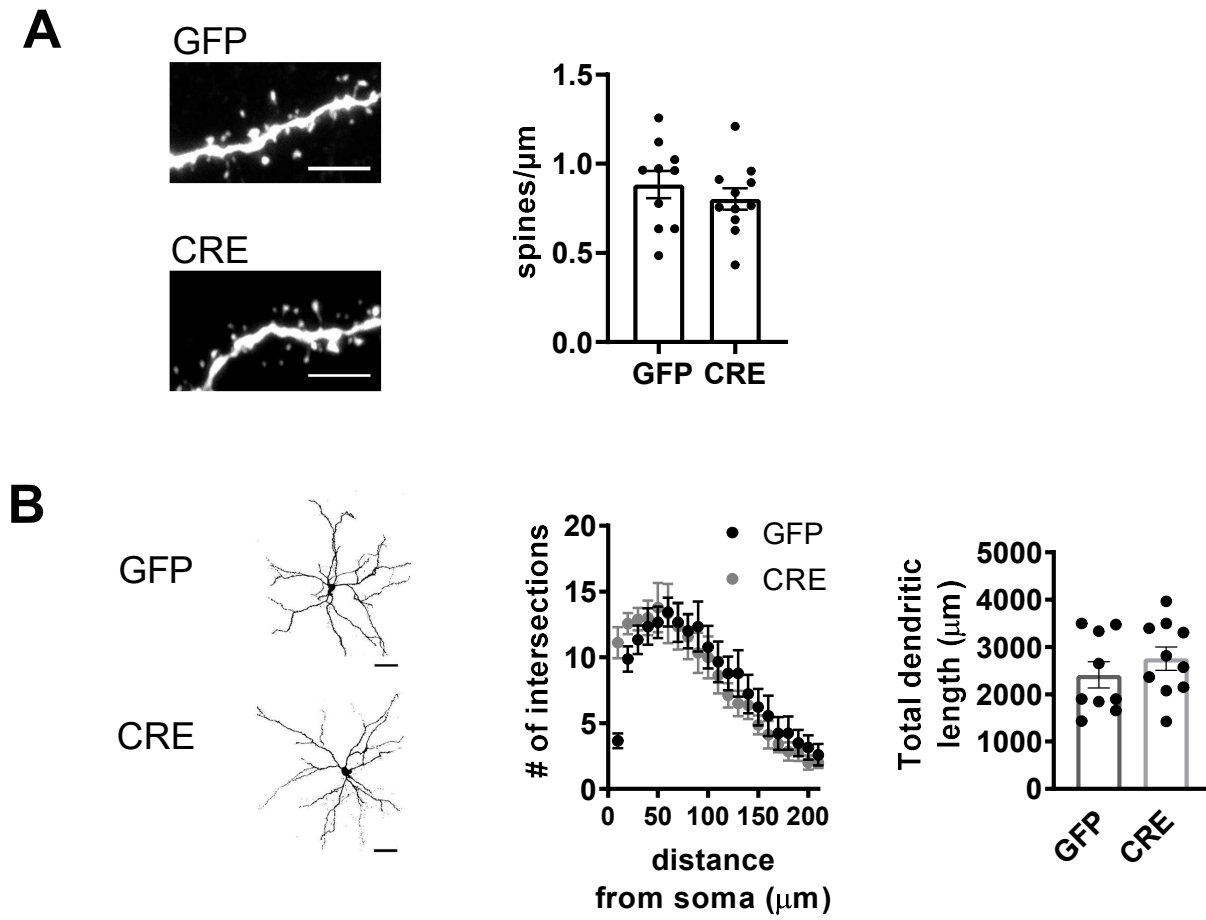

Supplement: supp [file elife-52798-supp-v1.zip]

Figure 6 - figure supplement 3

A

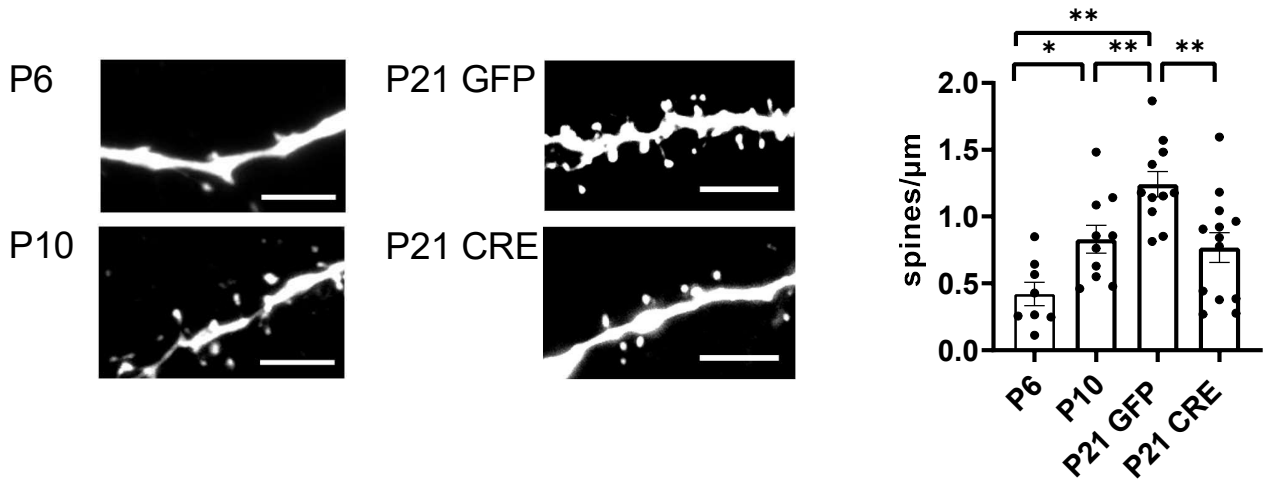

B

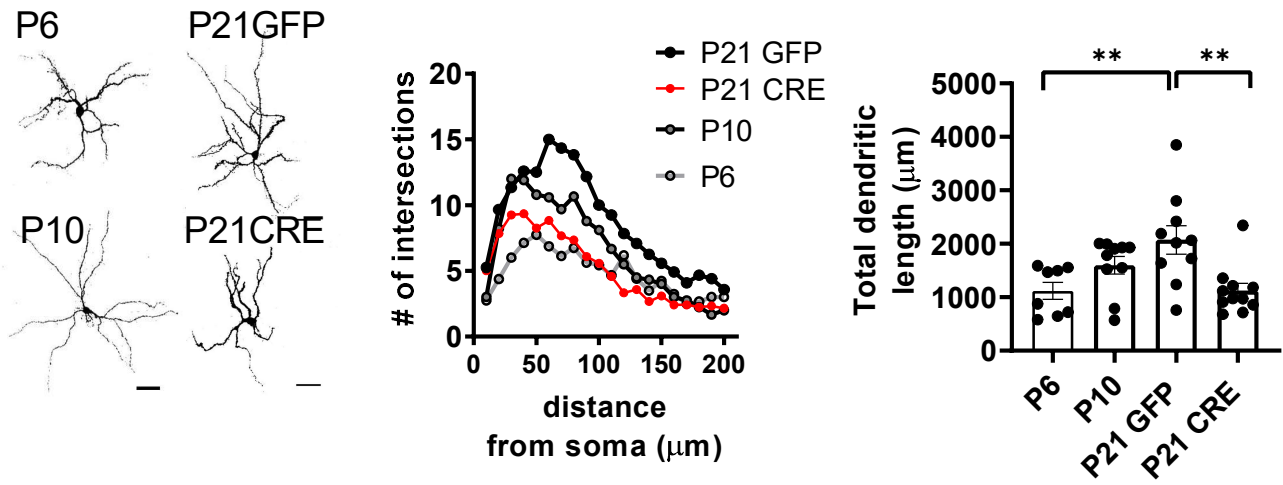

Supplement: supp [file elife-52798-supp-v1.zip]
